# Supplementary material
Source: PubMed Central journal article supplement (PMC9994418)
Supplement: NIHMS1528390-supplement-1.pdf [file NIHMS1528390-supplement-1.pdf]

759 **Supplemental Material**760 Table S1. Individual laboratory mean and standard deviation (sd) log<sub>10</sub> gene copy estimates/5 μL of DNA extract for  
761 individual samples from ΔΔCT (DD) and standard curve (SC) methods<sup>a</sup>

762

| lab             | sample 1 |       |         |       | sample 2 |       |         |       | sample 3 |       |         |       |
|-----------------|----------|-------|---------|-------|----------|-------|---------|-------|----------|-------|---------|-------|
|                 | DD mean  | DD sd | SC mean | SC sd | DD mean  | DD sd | SC mean | SC sd | DD mean  | DD sd | SC mean | SC sd |
| 1               | 1.169    | 0.062 | 1.177   | 0.048 | 1.078    | 0.066 | 1.086   | 0.052 | 1.977    | 0.058 | 1.985   | 0.041 |
| 2               | 1.062    | 0.096 | 1.186   | 0.085 | 1.092    | 0.093 | 1.216   | 0.082 | 1.996    | 0.092 | 2.120   | 0.081 |
| 3               | 1.089    | 0.302 | 1.243   | 0.303 | 0.787    | 0.067 | 0.942   | 0.070 | 1.742    | 0.096 | 1.896   | 0.098 |
| 4               | B        | -     | B       | -     | B        | -     | B       | -     | B        | -     | B       | -     |
| 5               | 1.230    | 0.142 | 1.459   | 0.142 | 1.011    | 0.137 | 1.239   | 0.137 | 1.777    | 0.067 | 2.005   | 0.068 |
| 6               | F        | -     | F       | -     | 1.178    | 0.095 | 0.916   | 0.070 | 1.935    | 0.091 | 1.673   | 0.064 |
| 7               | 1.292    | 0.223 | 1.421   | 0.196 | 0.924    | 0.127 | 1.053   | 0.071 | 2.106    | 0.114 | 2.235   | 0.041 |
| 8               | F        | -     | F       | -     | F        | -     | F       | -     | 1.630    | 0.147 | 1.554   | 0.068 |
| 9               | F        | -     | F       | -     | 1.307    | 0.089 | 1.303   | 0.069 | 2.197    | 0.098 | 2.192   | 0.081 |
| 10              | D        | -     | D       | -     | D        | -     | D       | -     | D        | -     | D       | -     |
| 11              | F        | -     | F       | -     | 1.037    | 0.189 | 1.139   | 0.196 | 1.681    | 0.111 | 1.783   | 0.121 |
| 12              | 1.200    | 0.198 | 0.890   | 0.076 | 1.190    | 0.209 | 0.880   | 0.100 | 1.983    | 0.195 | 1.673   | 0.068 |
| 13              | F        | -     | F       | -     | 1.243    | 0.055 | 1.247   | 0.056 | 2.035    | 0.054 | 2.039   | 0.055 |
| 14              | F        | -     | F       | -     | A        | -     | A       | -     | A        | -     | A       | -     |
| 15              | F        | -     | F       | -     | 1.252    | 0.080 | 1.289   | 0.051 | 1.638    | 0.191 | 1.675   | 0.181 |
| 16              | 0.521    | 0.147 | 0.901   | 0.166 | 0.555    | 0.066 | 0.935   | 0.103 | 1.510    | 0.079 | 1.890   | 0.112 |
| 17              | D        | -     | D       | -     | 1.594    | 0.075 | 1.698   | 0.073 | 2.715    | 0.094 | 2.819   | 0.092 |
| 18              | F        | -     | F       | -     | 1.261    | 0.153 | 1.301   | 0.096 | 2.284    | 0.165 | 2.324   | 0.115 |
| 19              | D        | -     | D       | -     | 1.056    | 0.100 | 1.163   | 0.071 | 1.975    | 0.100 | 2.082   | 0.072 |
| 20              | B        | -     | B       | -     | B        | -     | B       | -     | B        | -     | B       | -     |
| 21 <sup>b</sup> | F        | -     | F       | -     | 0.944    | 0.137 | 1.640   | 0.130 | 1.967    | 0.116 | 2.664   | 0.113 |

| lab             | sample 4 |       |         |       | sample 5 |       |         |       | sample 6 |       |         |       |
|-----------------|----------|-------|---------|-------|----------|-------|---------|-------|----------|-------|---------|-------|
|                 | DD mean  | DD sd | SC mean | SC sd | DD mean  | DD sd | SC mean | SC sd | DD mean  | DD sd | SC mean | SC sd |
| 1               | F        | -     | F       | -     | 1.000    | 0.096 | 1.008   | 0.087 | 1.853    | 0.053 | 1.861   | 0.035 |
| 2               | F        | -     | F       | -     | 0.912    | 0.100 | 1.036   | 0.089 | 1.875    | 0.092 | 1.999   | 0.081 |
| 3               | F        | -     | F       | -     | F        | -     | F       | -     | 1.800    | 0.058 | 1.955   | 0.062 |
| 4               | B        | -     | B       | -     | B        | -     | B       | -     | B        | -     | B       | -     |
| 5               | 1.196    | 0.167 | 1.425   | 0.168 | 1.886    | 0.197 | 2.114   | 0.198 | 1.947    | 0.066 | 2.175   | 0.067 |
| 6               | F        | -     | F       | -     | F        | -     | F       | -     | 1.894    | 0.086 | 1.632   | 0.058 |
| 7               | F        | -     | F       | -     | 1.139    | 0.162 | 1.268   | 0.122 | 1.902    | 0.140 | 2.031   | 0.093 |
| 8               | F        | -     | F       | -     | F        | -     | F       | -     | 1.553    | 0.156 | 1.478   | 0.086 |
| 9               | F        | -     | F       | -     | 1.204    | 0.102 | 1.199   | 0.086 | 2.081    | 0.156 | 2.076   | 0.145 |
| 10              | F        | -     | F       | -     | F        | -     | F       | -     | 1.534    | 0.054 | 1.696   | 0.042 |
| 11              | F        | -     | F       | -     | F        | -     | F       | -     | 1.544    | 0.089 | 1.646   | 0.103 |
| 12              | F        | -     | F       | -     | 1.148    | 0.203 | 0.839   | 0.087 | 1.897    | 0.221 | 1.587   | 0.125 |
| 13              | F        | -     | F       | -     | F        | -     | F       | -     | 1.852    | 0.079 | 1.856   | 0.080 |
| 14              | F        | -     | F       | -     | 1.253    | 0.183 | 0.944   | 0.183 | 1.975    | 0.120 | 1.667   | 0.118 |
| 15              | F        | -     | F       | -     | 1.098    | 0.136 | 1.135   | 0.122 | 1.868    | 0.093 | 1.905   | 0.069 |
| 16              | F        | -     | F       | -     | F        | -     | F       | -     | 1.244    | 0.087 | 1.623   | 0.117 |
| 17              | F        | -     | F       | -     | F        | -     | F       | -     | 1.951    | 0.081 | 2.055   | 0.078 |
| 18              | F        | -     | F       | -     | 1.259    | 0.154 | 1.300   | 0.096 | 2.124    | 0.168 | 2.164   | 0.118 |
| 19              | F        | -     | F       | -     | F        | -     | F       | -     | 1.817    | 0.129 | 1.924   | 0.109 |
| 20              | B        | -     | B       | -     | B        | -     | B       | -     | B        | -     | B       | -     |
| 21 <sup>b</sup> | F        | -     | F       | -     | 0.972    | 0.120 | 1.668   | 0.112 | 1.811    | 0.118 | 2.507   | 0.114 |

| lab             | sample 7 |       |         |       | sample 8 |       |         |       | sample 9 |       |         |       |
|-----------------|----------|-------|---------|-------|----------|-------|---------|-------|----------|-------|---------|-------|
|                 | DD mean  | DD sd | SC mean | SC sd | DD mean  | DD sd | SC mean | SC sd | DD mean  | DD sd | SC mean | SC sd |
| 1               | F        | -     | F       | -     | 1.426    | 0.081 | 1.415   | 0.065 | 1.863    | 0.062 | 1.852   | 0.038 |
| 2               | F        | -     | F       | -     | 1.263    | 0.105 | 1.418   | 0.136 | 1.894    | 0.116 | 2.049   | 0.144 |
| 3               | F        | -     | F       | -     | 1.177    | 0.123 | 1.312   | 0.120 | 1.593    | 0.169 | 1.728   | 0.167 |
| 4               | B        | -     | B       | -     | B        | -     | B       | -     | B        | -     | B       | -     |
| 5               | C        | -     | C       | -     | C        | -     | C       | -     | C        | -     | C       | -     |
| 6               | F        | -     | F       | -     | 1.845    | 0.112 | 1.369   | 0.091 | 2.260    | 0.087 | 1.785   | 0.053 |
| 7               | F        | -     | F       | -     | 1.335    | 0.130 | 1.432   | 0.119 | 1.883    | 0.096 | 1.980   | 0.079 |
| 8               | F        | -     | F       | -     | 1.259    | 0.143 | 1.484   | 0.105 | 1.706    | 0.108 | 1.931   | 0.050 |
| 9               | F        | -     | F       | -     | 1.357    | 0.158 | 1.382   | 0.149 | 1.994    | 0.103 | 2.019   | 0.087 |
| 10              | F        | -     | F       | -     | 1.480    | 0.056 | 1.599   | 0.045 | 1.889    | 0.070 | 2.008   | 0.063 |
| 11              | F        | -     | F       | -     | 1.130    | 0.148 | 1.213   | 0.152 | 1.593    | 0.149 | 1.676   | 0.153 |
| 12              | B        | -     | B       | -     | B        | -     | B       | -     | B        | -     | B       | -     |
| 13              | F        | -     | F       | -     | 1.366    | 0.051 | 1.378   | 0.045 | 1.930    | 0.039 | 1.941   | 0.031 |
| 14              | B        | -     | B       | -     | B        | -     | B       | -     | B        | -     | B       | -     |
| 15              | F        | -     | F       | -     | 1.469    | 0.161 | 1.442   | 0.103 | 1.939    | 0.199 | 1.912   | 0.156 |
| 16              | F        | -     | F       | -     | 0.671    | 0.179 | 1.142   | 0.148 | 1.309    | 0.174 | 1.780   | 0.142 |
| 17              | F        | -     | F       | -     | 1.063    | 0.085 | 1.129   | 0.084 | 1.540    | 0.069 | 1.606   | 0.067 |
| 18              | F        | -     | F       | -     | 2.153    | 0.165 | 2.132   | 0.095 | 2.595    | 0.240 | 2.575   | 0.199 |
| 19              | F        | -     | F       | -     | 1.384    | 0.105 | 1.428   | 0.101 | 1.946    | 0.054 | 1.990   | 0.048 |
| 20              | B        | -     | B       | -     | B        | -     | B       | -     | B        | -     | B       | -     |
| 21 <sup>b</sup> | F        | -     | F       | -     | 1.108    | 0.154 | 1.787   | 0.132 | 1.797    | 0.125 | 2.475   | 0.102 |

| lab             | sample 10 |       |         |       | sample 11 |       |         |       | sample 12 |       |         |       |
|-----------------|-----------|-------|---------|-------|-----------|-------|---------|-------|-----------|-------|---------|-------|
|                 | DD mean   | DD sd | SC mean | SC sd | DD mean   | DD sd | SC mean | SC sd | DD mean   | DD sd | SC mean | SC sd |
| 1               | F         | -     | F       | -     | 1.296     | 0.075 | 1.285   | 0.058 | 2.001     | 0.067 | 1.990   | 0.047 |
| 2               | F         | -     | F       | -     | 1.298     | 0.124 | 1.453   | 0.152 | 1.803     | 0.116 | 1.958   | 0.146 |
| 3               | F         | -     | F       | -     | 1.092     | 0.081 | 1.227   | 0.076 | 1.774     | 0.054 | 1.909   | 0.046 |
| 4               | B         | -     | B       | -     | B         | -     | B       | -     | B         | -     | B       | -     |
| 5               | C         | -     | C       | -     | C         | -     | C       | -     | C         | -     | C       | -     |
| 6               | F         | -     | F       | -     | 1.579     | 0.086 | 1.104   | 0.053 | 2.139     | 0.083 | 1.664   | 0.048 |
| 7               | F         | -     | F       | -     | 1.369     | 0.079 | 1.467   | 0.058 | 1.920     | 0.081 | 2.018   | 0.061 |
| 8               | F         | -     | F       | -     | 0.968     | 0.111 | 1.194   | 0.054 | 1.568     | 0.110 | 1.793   | 0.054 |
| 9               | F         | -     | F       | -     | 1.465     | 0.088 | 1.490   | 0.069 | 2.136     | 0.114 | 2.161   | 0.101 |
| 10              | F         | -     | F       | -     | 1.290     | 0.059 | 1.410   | 0.049 | 1.805     | 0.056 | 1.924   | 0.045 |
| 11              | D         | -     | D       | -     | 1.137     | 0.093 | 1.220   | 0.099 | 1.462     | 0.072 | 1.545   | 0.080 |
| 12              | B         | -     | B       | -     | B         | -     | B       | -     | B         | -     | B       | -     |
| 13              | F         | -     | F       | -     | 1.339     | 0.056 | 1.350   | 0.051 | 1.862     | 0.056 | 1.874   | 0.051 |
| 14              | B         | -     | B       | -     | B         | -     | B       | -     | B         | -     | B       | -     |
| 15              | F         | -     | F       | -     | 1.361     | 0.152 | 1.334   | 0.089 | 1.874     | 0.157 | 1.847   | 0.097 |
| 16              | F         | -     | F       | -     | 1.112     | 0.230 | 1.583   | 0.206 | 1.340     | 0.169 | 1.810   | 0.137 |
| 17              | D         | -     | D       | -     | 1.469     | 0.079 | 1.535   | 0.078 | 1.984     | 0.060 | 2.050   | 0.058 |
| 18              | F         | -     | F       | -     | 1.505     | 0.173 | 1.485   | 0.107 | 2.043     | 0.168 | 2.023   | 0.099 |
| 19              | F         | -     | F       | -     | 1.486     | 0.099 | 1.529   | 0.096 | 2.005     | 0.090 | 2.049   | 0.087 |
| 20              | B         | -     | B       | -     | B         | -     | B       | -     | B         | -     | B       | -     |
| 21 <sup>b</sup> | F         | -     | F       | -     | 1.198     | 0.126 | 1.876   | 0.098 | 1.812     | 0.115 | 2.490   | 0.089 |

| lab | sample 13 |       |         |       | sample 14 |       |         |       | sample 15 |       |         |       |
|-----|-----------|-------|---------|-------|-----------|-------|---------|-------|-----------|-------|---------|-------|
|     | DD mean   | DD sd | SC mean | SC sd | DD mean   | DD sd | SC mean | SC sd | DD mean   | DD sd | SC mean | SC sd |
| 1   | 4.692     | 0.126 | 4.693   | 0.119 | 3.692     | 0.121 | 3.693   | 0.114 | 2.973     | 0.143 | 2.974   | 0.137 |
| 2   | 4.358     | 0.187 | 4.507   | 0.111 | 3.617     | 0.185 | 3.765   | 0.106 | 3.077     | 0.180 | 3.225   | 0.096 |
| 3   | 4.186     | 0.081 | 4.305   | 0.067 | 3.448     | 0.108 | 3.566   | 0.097 | 3.003     | 0.169 | 3.122   | 0.162 |
| 4   | 4.395     | 0.240 | 4.378   | 0.063 | 3.641     | 0.236 | 3.625   | 0.040 | 3.009     | 0.240 | 2.993   | 0.062 |
| 5   | 4.309     | 0.066 | 4.563   | 0.074 | 3.423     | 0.042 | 3.677   | 0.053 | 2.790     | 0.057 | 3.044   | 0.065 |
| 6   | 4.601     | 0.111 | 4.239   | 0.068 | 3.651     | 0.108 | 3.289   | 0.064 | 3.075     | 0.100 | 2.713   | 0.050 |
| 7   | 4.483     | 0.105 | 4.543   | 0.093 | 3.777     | 0.175 | 3.837   | 0.168 | 3.028     | 0.205 | 3.088   | 0.200 |
| 8   | 4.291     | 0.133 | 4.366   | 0.065 | 3.561     | 0.131 | 3.637   | 0.062 | 2.717     | 0.185 | 2.793   | 0.146 |
| 9   | 4.784     | 0.095 | 4.748   | 0.077 | 4.028     | 0.096 | 3.991   | 0.078 | 3.373     | 0.100 | 3.337   | 0.083 |
| 10  | 3.987     | 0.105 | 4.119   | 0.099 | 3.638     | 0.080 | 3.770   | 0.072 | 3.012     | 0.061 | 3.144   | 0.051 |
| 11  | B         | -     | B       | -     | B         | -     | B       | -     | B         | -     | B       | -     |
| 12  | B         | -     | B       | -     | B         | -     | B       | -     | B         | -     | B       | -     |
| 13  | 4.459     | 0.112 | 4.493   | 0.111 | 3.535     | 0.053 | 3.569   | 0.049 | 3.030     | 0.046 | 3.063   | 0.041 |
| 14  | B         | -     | B       | -     | B         | -     | B       | -     | B         | -     | B       | -     |
| 15  | D         | -     | D       | -     | F         | -     | F       | -     | 2.937     | 0.302 | 3.138   | 0.312 |
| 16  | 3.897     | 0.061 | 4.370   | 0.071 | 3.079     | 0.046 | 3.552   | 0.059 | 2.521     | 0.077 | 2.994   | 0.085 |
| 17  | 4.803     | 0.104 | 4.713   | 0.094 | 3.898     | 0.070 | 3.808   | 0.055 | 3.347     | 0.068 | 3.257   | 0.052 |
| 18  | 4.663     | 0.145 | 4.678   | 0.105 | 3.825     | 0.158 | 3.840   | 0.123 | 3.372     | 0.139 | 3.386   | 0.097 |
| 19  | 4.449     | 0.157 | 4.513   | 0.132 | 3.421     | 0.161 | 3.484   | 0.134 | 3.016     | 0.177 | 3.079   | 0.154 |
| 20  | B         | -     | B       | -     | B         | -     | B       | -     | B         | -     | B       | -     |
| 21  | B         | -     | B       | -     | B         | -     | B       | -     | B         | -     | B       | -     |

| lab | sample 16 |       |         |       | sample 17 |       |         |       | sample 18 |       |         |       |
|-----|-----------|-------|---------|-------|-----------|-------|---------|-------|-----------|-------|---------|-------|
|     | DD mean   | DD sd | SC mean | SC sd | DD mean   | DD sd | SC mean | SC sd | DD mean   | DD sd | SC mean | SC sd |
| 1   | 1.309     | 0.084 | 1.310   | 0.072 | 1.555     | 0.070 | 1.556   | 0.055 | 2.052     | 0.057 | 2.053   | 0.038 |
| 2   | 1.182     | 0.191 | 1.331   | 0.114 | 1.616     | 0.183 | 1.765   | 0.102 | 2.057     | 0.174 | 2.206   | 0.085 |
| 3   | 0.954     | 0.082 | 1.073   | 0.068 | 1.283     | 0.083 | 1.402   | 0.069 | 1.720     | 0.076 | 1.838   | 0.061 |
| 4   | 1.160     | 0.242 | 1.144   | 0.067 | 1.528     | 0.245 | 1.512   | 0.075 | 1.674     | 0.295 | 1.657   | 0.181 |
| 5   | 1.141     | 0.102 | 1.395   | 0.105 | 1.226     | 0.052 | 1.479   | 0.058 | 1.697     | 0.061 | 1.950   | 0.067 |
| 6   | 1.300     | 0.135 | 0.938   | 0.105 | 1.657     | 0.098 | 1.295   | 0.049 | 2.057     | 0.100 | 1.695   | 0.051 |
| 7   | 1.207     | 0.102 | 1.268   | 0.089 | 1.504     | 0.099 | 1.564   | 0.085 | 2.109     | 0.085 | 2.169   | 0.070 |
| 8   | 1.198     | 0.147 | 1.274   | 0.090 | 1.361     | 0.155 | 1.436   | 0.103 | 1.743     | 0.207 | 1.819   | 0.173 |
| 9   | 1.212     | 0.086 | 1.176   | 0.067 | 1.768     | 0.103 | 1.732   | 0.087 | 1.979     | 0.114 | 1.943   | 0.099 |
| 10  | 1.185     | 0.088 | 1.317   | 0.080 | 1.352     | 0.049 | 1.484   | 0.035 | 1.751     | 0.076 | 1.883   | 0.067 |
| 11  | B         | -     | B       | -     | B         | -     | B       | -     | B         | -     | B       | -     |
| 12  | B         | -     | B       | -     | B         | -     | B       | -     | B         | -     | B       | -     |
| 13  | 1.135     | 0.130 | 1.169   | 0.128 | 1.598     | 0.082 | 1.632   | 0.079 | 1.965     | 0.049 | 1.999   | 0.045 |
| 14  | B         | -     | B       | -     | B         | -     | B       | -     | B         | -     | B       | -     |
| 15  | 1.386     | 0.127 | 1.587   | 0.149 | 1.716     | 0.098 | 1.917   | 0.126 | 2.081     | 0.421 | 2.282   | 0.429 |
| 16  | 0.810     | 0.292 | 1.283   | 0.294 | 0.928     | 0.076 | 1.401   | 0.083 | 1.200     | 0.061 | 1.673   | 0.069 |
| 17  | 1.475     | 0.077 | 1.385   | 0.065 | 1.633     | 0.093 | 1.543   | 0.082 | 1.969     | 0.129 | 1.879   | 0.121 |
| 18  | 1.243     | 0.119 | 1.258   | 0.064 | 1.657     | 0.122 | 1.672   | 0.070 | 2.112     | 0.125 | 2.127   | 0.076 |
| 19  | 1.105     | 0.150 | 1.168   | 0.120 | 1.413     | 0.150 | 1.477   | 0.121 | 1.835     | 0.164 | 1.898   | 0.138 |
| 20  | B         | -     | B       | -     | B         | -     | B       | -     | B         | -     | B       | -     |
| 21  | B         | -     | B       | -     | B         | -     | B       | -     | B         | -     | B       | -     |

763 <sup>a</sup>Criteria failure codes for unaccepted sample results: A, missing data; B, positive control EC23S587 and Sketa22 assay Ct  
764 values; C, negative control EC23S587 assay Ct values; D, matrix interference in test samples from Sketa22 assay Ct values; E,

765 excessive variability of duplicate EC23S857 assay Ct measurements in individual test sample filters; F, test samples EC23S857  
 766 assay Ct measurements > standardized LLOQ value.  
 767 <sup>b</sup>Results shown despite failure of laboratory to meet criteria for master standard curve acceptability  
 768

769 **Supplemental Material**

770 **# WinBugs code to estimate log<sub>10</sub>(copies) by Delta-Delta and Master curve methods**

771 **# l\_X = log<sub>10</sub>(X)**

772 **model**

```

773   {
774     for( i in 1 : n ) {
775       Y[i] ~ dnorm(mu[i],tau1[i])
776       mu[i] <- alpha[run[i]] + beta[run[i]] * l_X[i]
777       tau1[i] <- l_X[i]* tau[run[i]] }
778     for ( i in 1 : m ) {
779       beta[i] ~ dnorm(beta_bar,taub)
780       alpha[i] ~ dnorm(alpha_bar, taua) }
781   # non_informative priors
782     for ( i in 1:m ) {
783       tau[i] ~ dgamma(.001,.001) }
784     alpha_bar ~ dnorm(0,1.0E-4)
785     beta_bar ~ dnorm(0,1.E-4)
786   #  $\sigma^2 [i] = 1/\tau[i]$ ,  $\sigma^2_a = 1/\tau_a$ ,  $\sigma^2_b = 1/\tau_b$ 
787   #Dumouchal
788     U1 ~ dunif(0, 1)
789     U2 ~ dunif(0, 1)
790     sqrvarb <- s_slope_b * (1 - U1) / U1
791     varb <- sqrvarb * sqrvarb
792     taub <- 1/varb
793     sqrvara <- s_int_a * (1 - U2) / U2
794     vara <- sqrvara * sqrvara

```

```

795     taua <- 1/vara
796 #end Dumouchal
797
798     tau_ic <- 1/(s_ic*s_ic)
799     ct_bar_ic ~ dnorm(m_ic, tau_ic)
800     tau_sc <- 1/(sc*sc)
801     delta_ctc ~ dnorm(delta_mc, tau_sc)
802     tau_ctl <- 1/(s_l*s_l)
803     ct_cs ~ dnorm(ct_l, tau_ctl)
804
805     # unknowns estimated for delta-delta (DD) and master curve (MC)
806
807     for ( i in 1 :8) {
808     tau_delta0[i] <- 1/(delta_s0[i]*delta_s0[i])
809     delta_ct0[i] ~ dnorm(delta_m0[i], tau_delta0[i])
810     DD_l_copy[i] <- ( delta_ct0[i] - delta_ctc + ct_bar_ic - alpha_bar )/beta_bar
811     MC_l_copy[i] <- ( delta_ct0[i] + ct_cs - alpha_bar )/beta_bar     }
812
813     }
814
815 Data
816 list( n=103, m=5, s_slope_b = 0.06277, s_int_a= 0.15375, delta_mc = 7.64907, sc=0.037950761, m_ic= 27.4003, s_ic = 0.14549439,
817 ct_l = 19.7231 , s_l = 0.048328433)
818   run[]  l_X[]  Y[]
819 1      4.356  22.289
820 1      4.356  22.3072
821 1      4.356  22.0795
822 1      3.381  25.7887
823 1      3.381  25.7492
824 1      3.381  24.3353
825 1      2.371  29.1246

```



```
826 1 2.371 29.299
827 1 2.371 29.1204
828 1 1.641 31.5913
829 1 1.641 31.9838
830 1 1.641 32.4851
831 1 1.071 34.0938
832 1 1.071 33.8225
833 1 1.071 34.0158
834 1 0.770852 34.8831
835 1 0.770852 34.62
836 1 0.770852 34.9693
837 1 0.770852 33.992
838 1 0.770852 34.9188
839 1 0.770852 34.6947
840 2 4.356 22.3926
841 2 4.356 22.0545
842 .
843 .
844 .
845 .
846 5 0.770852 35.157
847 5 0.770852 34.4211
848 5 0.770852 33.5756
849 END;
850
851 delta_m0[] delta_s0[]
852
853 13.9363 0.139265
854 13.9036 0.156341401
855 12.943 1.05849361
856 14.1226 0.4704399
```

|     |         |             |
|-----|---------|-------------|
| 857 | 14.13   | 0.63201199  |
| 858 | 13.8034 | 0.172065431 |
| 859 | 13.2419 | 0.45524443  |
| 860 | 14.2595 | 0.15925901  |
| 861 |         |             |
| 862 | END;    |             |
| 863 |         |             |
